# Supplementary material for: A comprehensive investigation on the receptor BSG expression reveals the potential risk of healthy individuals and cancer patients to 2019-nCoV infection
Source: publisher site journal article supplement (doi:10.18632/aging.205655), 2024-03-13
Supplement: Supplementary file [file aging-v16i6-205655-supplementary-material-SD1.pdf]

**SUPPLEMENTARY FIGURE**

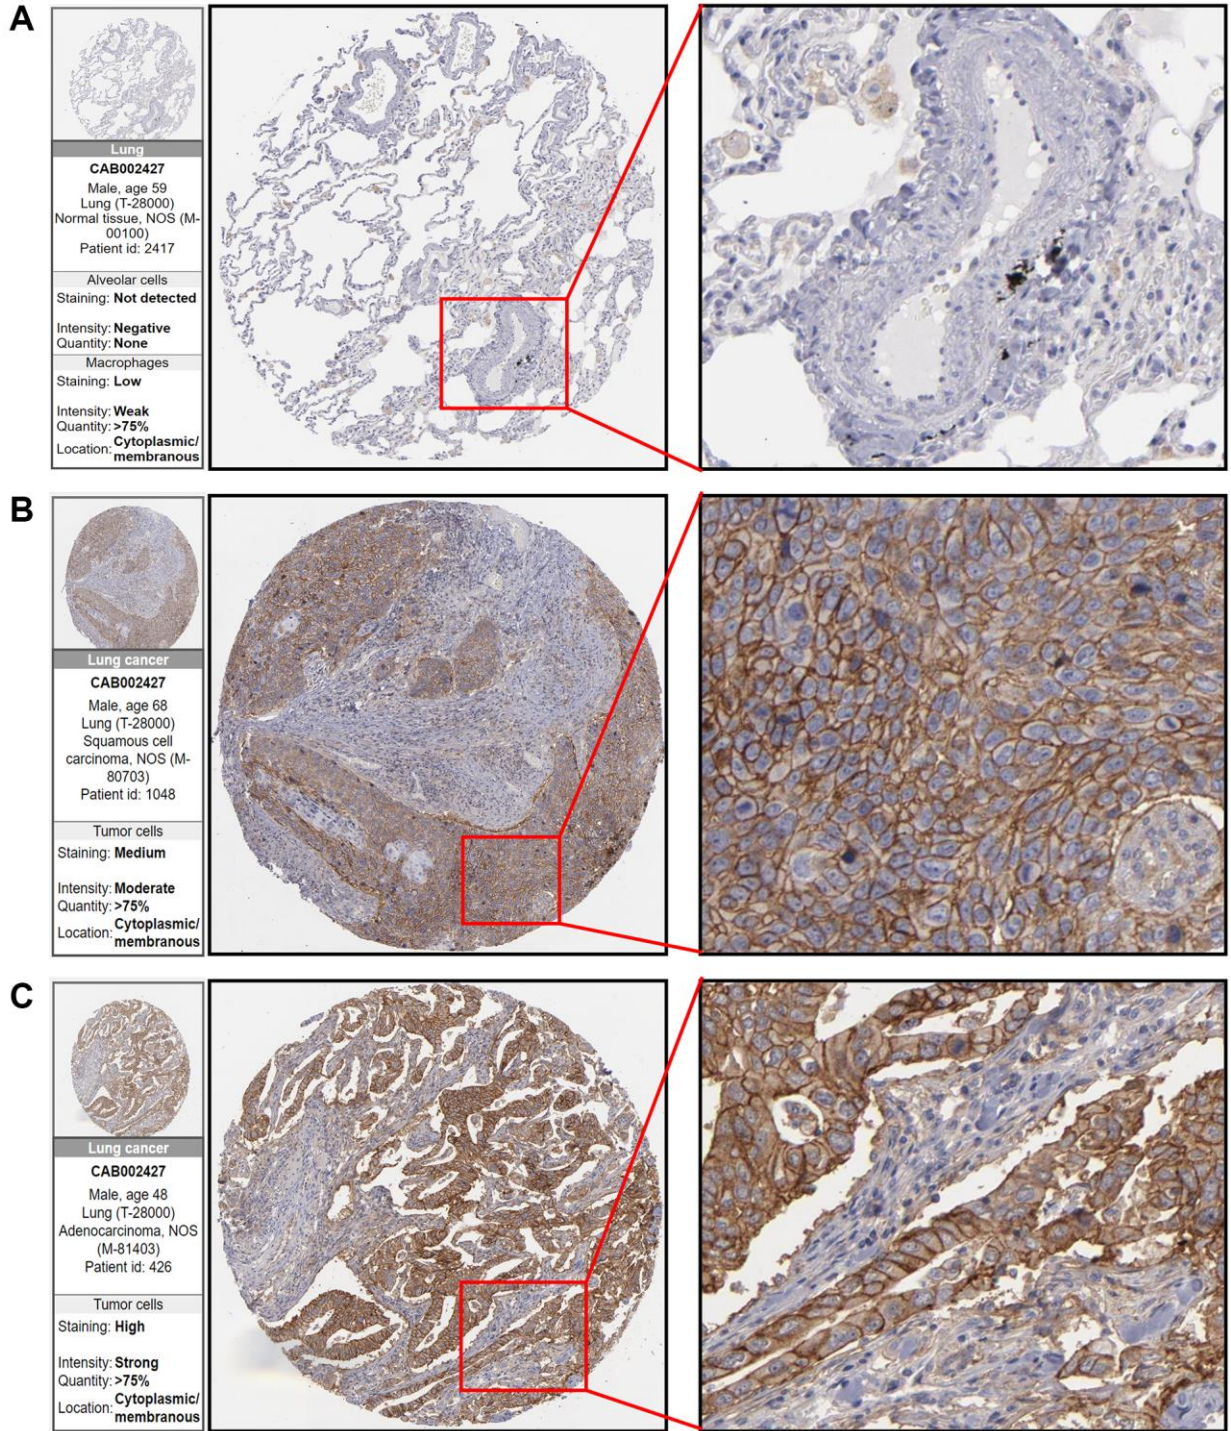

**Supplementary Figure 1. Immunohistochemical analysis of BSG in HPA database.** Representative staining for BSG in normal lung tissues (A), lung squamous cell tissue (B) and lung adenocarcinoma tissue (C).
